# Supplementary material for: Underestimation of personal carbon footprint inequality in four diverse countries
Source: Springer Nature journal article supplement (doi:10.1038/s41558-024-02130-y), 2024-09-12

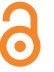

---

# Underestimation of personal carbon footprint inequality in four diverse countries

---

In the format provided by the authors and unedited

## Table of contents

|                        |       |    |
|------------------------|-------|----|
| Supplementary Table 1  | ..... | 2  |
| Supplementary Table 2  | ..... | 5  |
| Supplementary Table 3  | ..... | 6  |
| Supplementary Table 4  | ..... | 7  |
| Supplementary Table 5  | ..... | 8  |
| Supplementary Table 6  | ..... | 9  |
| Supplementary Table 7  | ..... | 10 |
| Supplementary Table 8  | ..... | 11 |
| Supplementary Table 9  | ..... | 12 |
| Supplementary Table 10 | ..... | 13 |
| Supplementary Table 11 | ..... | 14 |
| Supplementary Table 12 | ..... | 15 |
| Supplementary Table 13 | ..... | 16 |
| Supplementary Table 14 | ..... | 17 |
| Supplementary Table 15 | ..... | 18 |
| Supplementary Fig. 1   | ..... | 19 |
| Supplementary Fig. 2   | ..... | 20 |
| Supplementary Fig. 3   | ..... | 21 |
| Supplementary Fig. 4   | ..... | 22 |
| Supplementary Fig. 5   | ..... | 23 |
| Supplementary Fig. 6   | ..... | 24 |
| Supplementary Fig. 7   | ..... | 25 |

**Supplementary Table 1.** Descriptive statistics. Statistics for continuous variables are reported with mean, standard deviation, and median, whereas categorical variables are reported as percentages.

|                                    | Denmark |       |       |        | India |       |      |        | Nigeria |       |       |        | United States |       |       |        |
|------------------------------------|---------|-------|-------|--------|-------|-------|------|--------|---------|-------|-------|--------|---------------|-------|-------|--------|
|                                    | N       | Mean  | SD    | Median | N     | Mean  | SD   | Median | N       | Mean  | SD    | Median | N             | Mean  | SD    | Median |
| <b>Socio-demographics</b>          |         |       |       |        |       |       |      |        |         |       |       |        |               |       |       |        |
| Age                                | 1,001   | 52.80 | 15.42 | 53     | 1,001 | 31.11 | 9.62 | 29     | 1,001   | 35.43 | 10.51 | 34     | 1,000         | 50.07 | 17.85 | 48     |
| Income group                       | 1,001   |       |       |        | 1,001 |       |      |        | 1,001   |       |       |        | 1,000         |       |       |        |
| ... General population             | 501     | 50%   |       |        | 501   | 50%   |      |        | 500     | 50%   |       |        | 500           | 50%   |       |        |
| ... Top 10% of income              | 500     | 50%   |       |        | 500   | 50%   |      |        | 501     | 50%   |       |        | 500           | 50%   |       |        |
| Income (15 categories)             | 1,001   | 8.27  | 3.33  | 9.00   | 1,001 | 9.01  | 4.34 | 9.00   | 1,001   | 8.00  | 4.66  | 10.00  | 1,000         | 8.32  | 3.66  | 9.50   |
| Gender                             | 1,001   |       |       |        | 1,001 |       |      |        | 1,001   |       |       |        | 1,000         |       |       |        |
| ... Male                           | 540     | 54%   |       |        | 587   | 59%   |      |        | 738     | 74%   |       |        | 408           | 41%   |       |        |
| ... Female                         | 460     | 46%   |       |        | 411   | 41%   |      |        | 261     | 26%   |       |        | 583           | 58%   |       |        |
| ... Non-binary / third gender      | 1       | 0.1%  |       |        | 2     | 0.2%  |      |        | 1       | 0.1%  |       |        | 9             | 0.9%  |       |        |
| ... Prefer not to say              | 0       | 0%    |       |        | 1     | 0.1%  |      |        | 1       | 0.1%  |       |        | 0             | 0%    |       |        |
| Education                          | 1,001   |       |       |        | 1,001 |       |      |        | 1,001   |       |       |        | 1,000         |       |       |        |
| ... No schooling completed         | 1       | 0.1%  |       |        | 1     | 0.1%  |      |        | 1       | 0.1%  |       |        | 3             | 0.3%  |       |        |
| ... Primary school                 | 3       | 0.3%  |       |        | 3     | 0.3%  |      |        | 1       | 0.1%  |       |        | 6             | 0.6%  |       |        |
| ... Lower secondary school         | 51      | 5%    |       |        | 7     | 0.7%  |      |        | 9       | 0.9%  |       |        | 9             | 0.9%  |       |        |
| ... Vocational degree              | 241     | 24%   |       |        | 20    | 2%    |      |        | 32      | 3%    |       |        | 59            | 6%    |       |        |
| ... High school                    | 89      | 9%    |       |        | 59    | 6%    |      |        | 149     | 15%   |       |        | 221           | 22%   |       |        |
| ... College degree                 | 303     | 30%   |       |        | 487   | 49%   |      |        | 599     | 60%   |       |        | 428           | 43%   |       |        |
| ... Master's degree or above       | 313     | 31%   |       |        | 424   | 42%   |      |        | 210     | 21%   |       |        | 274           | 27%   |       |        |
| Political orientation (left-right) | 993     | 4.17  | 1.51  | 4      | 1,001 | 4.91  | 1.55 | 5      | 1,001   | 4.95  | 1.60  | 5      | 998           | 4.25  | 1.75  | 4.00   |

**Carbon footprint perceptions**

|                                                                               |       |       |        |       |       |       |        |       |       |       |        |        |       |       |        |       |
|-------------------------------------------------------------------------------|-------|-------|--------|-------|-------|-------|--------|-------|-------|-------|--------|--------|-------|-------|--------|-------|
| CF estimate – Bottom 50%                                                      | 1,001 | 13.21 | 61.43  | 8.00  | 1,001 | 38.71 | 215.28 | 2.00  | 1,001 | 12.46 | 111.63 | 1.00   | 1,000 | 32.64 | 137.25 | 17.00 |
| CF estimate – Top 10%                                                         | 1,001 | 21.50 | 97.42  | 12.90 | 1,001 | 35.45 | 203.19 | 2.20  | 1,001 | 17.07 | 133.07 | 4.20   | 1,000 | 44.37 | 146.20 | 25.00 |
| CF estimate – Top 1%                                                          | 1,001 | 26.60 | 102.33 | 15.00 | 1,001 | 34.30 | 197.43 | 2.20  | 1,001 | 15.58 | 104.43 | 7.50   | 1,000 | 56.86 | 178.24 | 28.00 |
| CF estimate – Bottom 50%<br>(without preregistered outliers)                  | 957   | 8.92  | 3.29   | 8.00  | 962   | 6.97  | 18.20  | 2.00  | 971   | 2.21  | 5.99   | 1.00   | 958   | 18.53 | 10.71  | 17.00 |
| CF estimate – Top 10%<br>(without preregistered outliers)                     | 952   | 14.37 | 6.35   | 12.90 | 962   | 7.69  | 19.85  | 2.20  | 962   | 4.56  | 6.17   | 4.20   | 967   | 28.71 | 22.30  | 25.00 |
| CF estimate – Top 1%<br>(without preregistered outliers)                      | 967   | 18.13 | 11.97  | 15.00 | 976   | 8.16  | 23.05  | 2.20  | 976   | 5.98  | 4.05   | 7.00   | 955   | 34.22 | 34.59  | 28.00 |
| Relative error – Bottom 50%                                                   | 1,001 | 1.20  | 10.24  | 0.33  | 1,001 | 37.71 | 215.28 | 1.00  | 1,001 | 12.84 | 124.03 | 0.11   | 1,000 | 2.37  | 14.15  | 0.75  |
| Relative error – Top 10%                                                      | 1,001 | -0.28 | 3.28   | -0.57 | 1,001 | 3.03  | 23.09  | -0.75 | 1,001 | 2.88  | 30.24  | -0.045 | 1,000 | -0.41 | 1.96   | -0.67 |
| Relative error – Top 1%                                                       | 1,001 | -0.71 | 1.10   | -0.84 | 1,001 | 0.059 | 6.09   | -0.93 | 1,001 | 0.69  | 11.35  | -0.18  | 1,000 | -0.79 | 0.66   | -0.90 |
| Relative error – Bottom 50%<br>(without preregistered outliers)               | 957   | 0.49  | 0.55   | 0.33  | 962   | 5.97  | 18.20  | 1.00  | 971   | 1.46  | 6.66   | 0.11   | 958   | 0.91  | 1.10   | 0.75  |
| Relative error – Top 10%<br>(without preregistered outliers)                  | 952   | -0.52 | 0.21   | -0.57 | 962   | -0.13 | 2.26   | -0.75 | 962   | 0.037 | 1.40   | -0.045 | 967   | -0.62 | 0.30   | -0.67 |
| Relative error – Top 1%<br>(without preregistered outliers)                   | 967   | -0.81 | 0.13   | -0.84 | 976   | -0.75 | 0.71   | -0.93 | 976   | -0.35 | 0.44   | -0.24  | 955   | -0.87 | 0.13   | -0.90 |
| Carbon footprint inequality<br>perception                                     | 1,001 | 1.92  | 9.70   | 1.20  | 1,001 | 37.65 | 212.27 | 1.89  | 1,001 | 12.15 | 119.04 | 0.48   | 1,000 | 3.15  | 14.03  | 1.60  |
| Carbon footprint inequality<br>perception (without preregistered<br>outliers) | 931   | 1.30  | 0.58   | 1.20  | 949   | 6.75  | 18.13  | 1.89  | 956   | 1.42  | 4.94   | 0.48   | 920   | 1.81  | 1.12   | 1.65  |

**Climate policy support**

|                                       |       |      |      |      |       |      |      |      |       |      |      |      |       |      |      |      |
|---------------------------------------|-------|------|------|------|-------|------|------|------|-------|------|------|------|-------|------|------|------|
| Climate policy support<br>(composite) | 1,001 | 4.40 | 1.23 | 4.42 | 1,001 | 5.06 | 1.04 | 5.08 | 1,001 | 4.73 | 0.97 | 4.75 | 1,000 | 4.04 | 1.41 | 4.17 |
| Carbon tax                            | 1,001 | 4.23 | 1.78 | 4    | 1,001 | 4.60 | 1.92 | 5    | 1,001 | 4.48 | 1.84 | 5    | 1,000 | 3.60 | 2.07 | 4.00 |

|                                                                 |       |      |      |      |       |      |      |      |       |      |      |      |       |      |      |      |
|-----------------------------------------------------------------|-------|------|------|------|-------|------|------|------|-------|------|------|------|-------|------|------|------|
| Expand public transport                                         | 1,001 | 4.98 | 1.72 | 5    | 1,001 | 6.05 | 1.38 | 7    | 1,001 | 5.66 | 1.49 | 6    | 1,000 | 5.09 | 1.64 | 5.00 |
| Increase price of peak electricity consumption                  | 1,001 | 3.12 | 1.79 | 3    | 1,001 | 3.76 | 2.05 | 4    | 1,001 | 4.08 | 2.09 | 4    | 1,000 | 3.05 | 1.94 | 3.00 |
| Subsize renewable energy                                        | 1,001 | 5.50 | 1.55 | 6    | 1,001 | 5.89 | 1.53 | 7    | 1,001 | 5.18 | 1.71 | 5    | 1,000 | 4.85 | 1.92 | 5.00 |
| Strengthen energy efficiency requirements in buildings          | 1,001 | 5.20 | 1.45 | 5    | 1,001 | 5.74 | 1.40 | 6    | 1,001 | 5.50 | 1.48 | 6    | 1,000 | 5.04 | 1.70 | 5.00 |
| Mandate GHG disclosure by banks and investment companies        | 1,001 | 4.21 | 1.80 | 4    | 1,001 | 5.46 | 1.56 | 6    | 1,001 | 5.14 | 1.65 | 5    | 1,000 | 4.31 | 1.96 | 4.00 |
| Tax on red meat                                                 | 1,001 | 3.25 | 2.00 | 3    | 1,001 | 4.64 | 2.10 | 5    | 1,001 | 3.82 | 1.92 | 4    | 1,000 | 2.88 | 1.96 | 2.00 |
| Tax on air travel                                               | 1,001 | 4.30 | 1.95 | 4    | 1,001 | 4.19 | 1.97 | 4    | 1,001 | 4.13 | 1.87 | 4    | 1,000 | 3.26 | 1.98 | 3.00 |
| Introduce mandatory carbon footprint label                      | 1,001 | 4.46 | 1.71 | 4    | 1,001 | 5.48 | 1.55 | 6    | 1,001 | 5.04 | 1.62 | 5    | 1,000 | 4.19 | 1.94 | 4.00 |
| Ban diesel and petrol cars                                      | 1,001 | 3.27 | 1.95 | 3    | 1,001 | 3.97 | 2.03 | 4    | 1,001 | 3.82 | 2.16 | 4    | 1,000 | 2.94 | 1.96 | 3.00 |
| Subsidize CDR technologies                                      | 1,001 | 5.39 | 1.49 | 6    | 1,001 | 5.44 | 1.79 | 6    | 1,001 | 5.15 | 1.66 | 5    | 1,000 | 4.80 | 1.86 | 5.00 |
| Subsidize low-impact foods                                      | 1,001 | 4.85 | 1.71 | 5    | 1,001 | 5.52 | 1.66 | 6    | 1,001 | 4.80 | 1.84 | 5    | 1,000 | 4.51 | 1.93 | 5.00 |
| <b>Perceived fairness of actual carbon footprint inequality</b> | 1,001 | 3.12 | 1.65 | 3    | 1,001 | 4.01 | 2.11 | 4    | 1,001 | 4.17 | 1.80 | 4    | 1,000 | 3.37 | 1.91 | 3.00 |
| <b>Psychological</b>                                            |       |      |      |      |       |      |      |      |       |      |      |      |       |      |      |      |
| Climate change concern                                          | 1,001 | 4.43 | 1.48 | 4.50 | 1,001 | 6.15 | 1.14 | 6.50 | 1,001 | 5.53 | 1.34 | 5.50 | 1,000 | 4.55 | 1.92 | 5.00 |
| Personal norms                                                  | 1,001 | 4.53 | 1.69 | 5    | 1,001 | 6.02 | 1.26 | 7    | 1,001 | 5.56 | 1.34 | 6    | 1,000 | 4.37 | 1.94 | 5.00 |
| Descriptive norms                                               | 1,001 | 4.01 | 1.46 | 4    | 1,001 | 5.28 | 1.58 | 6    | 1,001 | 4.86 | 1.59 | 5    | 1,000 | 3.81 | 1.84 | 4.00 |
| Trust in government                                             | 1,001 | 3.57 | 1.58 | 4    | 1,001 | 5.21 | 1.64 | 5    | 1,001 | 3.96 | 2.06 | 4    | 1,000 | 3.29 | 1.88 | 3.00 |

**Supplementary Table 2.** Relative estimation error associated with estimated personal carbon footprints (test of hypothesis 1).

|                                                      | Without outliers<br>(pre-registered) |               | Full sample                      |                |
|------------------------------------------------------|--------------------------------------|---------------|----------------------------------|----------------|
|                                                      | <i>Estimates</i>                     | <i>95% CI</i> | <i>Estimates</i>                 | <i>95% CI</i>  |
| (Intercept)                                          | 2.21 ***                             | 1.42, 3.01    | 14.65 ***                        | 8.83, 20.47    |
| Estimation error (Top 1%)                            | -2.90 ***                            | -3.15, -2.65  | -13.72 ***                       | -16.77, -10.67 |
| Estimation error (Top 10%)                           | -2.51 ***                            | -2.76, -2.26  | -12.23 ***                       | -15.27, -9.18  |
| Income segment (Top 10%)                             | -0.01                                | -0.23, 0.21   | -2.25                            | -5.10, 0.60    |
| <b>Random Effects</b>                                |                                      |               |                                  |                |
| $\sigma^2$                                           | 31.37                                |               | 4,841.87                         |                |
| $\tau_{00}$                                          | 1.71 <small>ResponseId</small>       |               | 503.16 <small>ResponseId</small> |                |
|                                                      | 0.61 <small>country</small>          |               | 27.80 <small>country</small>     |                |
| ICC                                                  | 0.07                                 |               | 0.10                             |                |
| N                                                    | 4 <small>country</small>             |               | 4 <small>country</small>         |                |
|                                                      | 3,970 <small>ResponseId</small>      |               | 4,003 <small>ResponseId</small>  |                |
| Observations                                         | 11,565                               |               | 12,009                           |                |
| Marginal R <sup>2</sup> / Conditional R <sup>2</sup> | 0.047 / 0.112                        |               | 0.007 / 0.105                    |                |

*Income segment (Top 10%) refers to participants belonging to the Top 10% of income within their country and shows coefficients relative to belonging to the general population. \*p < .05, \*\*p < .01, \*\*\*p < .001*

**Supplementary Table 3.** Linear regression models predicting carbon footprint inequality perception with covariates by country.

|                                          | <b>Total</b>             | <b>Denmark</b>            | <b>India</b>             | <b>Nigeria</b>              | <b>United States</b>      |
|------------------------------------------|--------------------------|---------------------------|--------------------------|-----------------------------|---------------------------|
| (Intercept)                              | 1.25 **<br>[0.49, 2.00]  | 1.31 ***<br>[1.24, 1.37]  | 6.76 ***<br>[4.82, 8.69] | 1.51 ***<br>[1.01, 2.02]    | 1.85 ***<br>[1.70, 2.00]  |
| Climate change concern                   | -0.21<br>[-0.65, 0.23]   | 0.01<br>[-0.05, 0.07]     | -0.25<br>[-1.82, 1.32]   | -0.82 ***<br>[-1.24, -0.40] | -0.15 *<br>[-0.29, -0.01] |
| Personal norm                            | -0.25<br>[-0.71, 0.21]   | -0.07 *<br>[-0.13, -0.01] | -1.44<br>[-3.03, 0.15]   | 0.54 **<br>[0.13, 0.94]     | 0.10<br>[-0.05, 0.25]     |
| Descriptive norm                         | 0.54 **<br>[0.16, 0.92]  | 0.03<br>[-0.01, 0.08]     | 1.45 *<br>[0.06, 2.84]   | 0.35<br>[-0.03, 0.73]       | 0.06<br>[-0.05, 0.18]     |
| Trust in government                      | 0.39 *<br>[0.06, 0.72]   | -0.02<br>[-0.05, 0.02]    | 1.25<br>[-0.07, 2.57]    | -0.09<br>[-0.44, 0.25]      | 0.02<br>[-0.07, 0.10]     |
| Political orientation                    | 0.59 ***<br>[0.28, 0.90] | 0.06 **<br>[0.02, 0.10]   | 1.98 **<br>[0.74, 3.21]  | -0.02<br>[-0.35, 0.32]      | 0.05<br>[-0.03, 0.13]     |
| Age                                      | -0.26<br>[-0.57, 0.06]   | -0.02<br>[-0.05, 0.02]    | -0.18<br>[-1.36, 1.01]   | -0.97 ***<br>[-1.31, -0.62] | -0.08 *<br>[-0.16, -0.00] |
| Top 10% of income                        | -0.19<br>[-0.83, 0.44]   | -0.07<br>[-0.14, 0.01]    | 0.09<br>[-2.26, 2.44]    | -0.18<br>[-0.89, 0.53]      | -0.12<br>[-0.27, 0.04]    |
| Female                                   | 0.29<br>[-0.35, 0.92]    | 0.06<br>[-0.02, 0.13]     | -0.00<br>[-2.35, 2.34]   | 0.05<br>[-0.66, 0.76]       | 0.04<br>[-0.12, 0.20]     |
| Ref. (Denmark)                           |                          |                           |                          |                             |                           |
| India                                    | 5.50 ***<br>[4.64, 6.35] |                           |                          |                             |                           |
| Nigeria                                  | 0.18<br>[-0.68, 1.05]    |                           |                          |                             |                           |
| United States                            | 0.48<br>[-0.39, 1.35]    |                           |                          |                             |                           |
| Observations                             | 3,747                    | 923                       | 949                      | 956                         | 919                       |
| R <sup>2</sup> / R <sup>2</sup> adjusted | 0.065 / 0.061            | 0.030 / 0.021             | 0.030 / 0.020            | 0.052 / 0.043               | 0.020 / 0.010             |

*Top 10% of income shows a coefficient relative to participants belonging to the 'general population' in their country, whereas Female shows a coefficient relative to identifying as male. \*p < .05, \*\*p < .01, \*\*\*p < .001*

**Supplementary Table 4.** Composite climate policy support (test of hypothesis 2).

|                                                         | <b>Without outliers<br/>(pre-registered)</b> |               | <b>Full sample</b>      |               | <b>Top 10% reference</b> |               |
|---------------------------------------------------------|----------------------------------------------|---------------|-------------------------|---------------|--------------------------|---------------|
|                                                         | <i>Estimates</i>                             | <i>95% CI</i> | <i>Estimates</i>        | <i>95% CI</i> | <i>Estimates</i>         | <i>95% CI</i> |
| (Intercept)                                             | 4.52 ***                                     | 4.14, 4.91    | 4.50 ***                | 4.13, 4.88    | 4.53 ***                 | 4.16, 4.91    |
| CF inequality perception                                | -0.07 ***                                    | -0.11, -0.03  | -0.03                   | -0.06, 0.01   | -0.07 ***                | -0.10, -0.03  |
| Top 10% of income                                       | 0.08 *                                       | 0.01, 0.16    | 0.11 **                 | 0.04, 0.18    | 0.09 *                   | 0.01, 0.16    |
| <b>Random Effects</b>                                   |                                              |               |                         |               |                          |               |
| $\sigma^2$                                              | 1.34                                         |               | 1.37                    |               | 1.34                     |               |
| $\tau_{00}$                                             | 0.15 <sub>country</sub>                      |               | 0.14 <sub>country</sub> |               | 0.14 <sub>country</sub>  |               |
| ICC                                                     | 0.10                                         |               | 0.09                    |               | 0.10                     |               |
| N                                                       | 4 <sub>country</sub>                         |               | 4 <sub>country</sub>    |               | 4 <sub>country</sub>     |               |
| Observations                                            | 3,756                                        |               | 4,003                   |               | 3,757                    |               |
| Marginal R <sup>2</sup> /<br>Conditional R <sup>2</sup> | 0.004 / 0.106                                |               | 0.002 / 0.096           |               | 0.004 / 0.101            |               |

*Top 10% of income shows a coefficient relative to participants belonging to the 'general population' in their country. \*p < .05, \*\*p < .01, \*\*\*p < .001*



**Supplementary Table 5.** Linear regression models predicting composite climate policy support by country.

|                                          | <b>Total</b>                | <b>Denmark</b>              | <b>India</b>             | <b>Nigeria</b>              | <b>United States</b>     |
|------------------------------------------|-----------------------------|-----------------------------|--------------------------|-----------------------------|--------------------------|
| (Intercept)                              | 4.37 ***<br>[4.29, 4.45]    | 4.38 ***<br>[4.27, 4.49]    | 4.92 ***<br>[4.92, 5.01] | 4.77 ***<br>[4.69, 4.86]    | 4.02 ***<br>[3.89, 4.15] |
| CF inequality perception                 | -0.07 ***<br>[-0.11, -0.03] | -0.17 ***<br>[-0.25, -0.09] | 0.00<br>[-0.06, 0.07]    | -0.12 ***<br>[-0.18, -0.06] | 0.00<br>[-0.09, 0.09]    |
| Top 10% of income                        | 0.08 *<br>[0.01, 0.16]      | 0.07<br>[-0.08, 0.23]       | 0.29 ***<br>[0.16, 0.42] | -0.03<br>[-0.15, 0.09]      | -0.01<br>[-0.19, 0.17]   |
| Ref. (Denmark)                           |                             |                             |                          |                             |                          |
| India                                    | 0.65 ***<br>[0.55, 0.76]    |                             |                          |                             |                          |
| Nigeria                                  | 0.34 ***<br>[0.24, 0.45]    |                             |                          |                             |                          |
| United States                            | -0.40 ***<br>[-0.50, -0.29] |                             |                          |                             |                          |
| Observations                             | 3,756                       | 931                         | 949                      | 956                         | 920                      |
| R <sup>2</sup> / R <sup>2</sup> adjusted | 0.106 / 0.105               | 0.020 / 0.018               | 0.020 / 0.018            | 0.015 / 0.013               | 0.000 / -0.002           |

*Top 10% of income shows a coefficient relative to participants belonging to the 'general population' in their country. \* $p < .05$ , \*\* $p < .01$ , \*\*\* $p < .001$*

**Supplementary Table 6.** Linear regression models predicting composite climate policy support with an interaction effect between carbon footprint inequality perception and participants' income segment.

|                                              | <b>Total</b>                | <b>Denmark</b>            | <b>India</b>             | <b>Nigeria</b>              | <b>United States</b>     |
|----------------------------------------------|-----------------------------|---------------------------|--------------------------|-----------------------------|--------------------------|
| (Intercept)                                  | 4.37 ***<br>[4.29, 4.46]    | 4.37 ***<br>[4.26, 4.49]  | 4.92 ***<br>[4.83, 5.01] | 4.77 ***<br>[4.69, 4.86]    | 4.02 ***<br>[3.89, 4.15] |
| CF inequality perception                     | -0.09 ***<br>[-0.13, -0.04] | -0.10 *<br>[-0.20, -0.01] | -0.01<br>[-0.11, 0.09]   | -0.15 ***<br>[-0.21, -0.08] | -0.05<br>[-0.17, 0.07]   |
| Top 10% of income                            | 0.09 *<br>[0.01, 0.16]      | 0.07<br>[-0.09, 0.23]     | 0.29 ***<br>[0.16, 0.42] | -0.03<br>[-0.15, 0.09]      | -0.01<br>[-0.19, 0.18]   |
| CF inequality perception × Top 10% of income | 0.05<br>[-0.03, 0.12]       | -0.18 *<br>[-0.35, -0.02] | 0.03<br>[-0.11, 0.16]    | 0.13<br>[-0.02, 0.28]       | 0.12<br>[-0.07, 0.30]    |
| Ref. (Denmark)                               |                             |                           |                          |                             |                          |
| India                                        | 0.65 ***<br>[0.55, 0.76]    |                           |                          |                             |                          |
| Nigeria                                      | 0.34 ***<br>[0.24, 0.45]    |                           |                          |                             |                          |
| United States                                | -0.40 ***<br>[-0.50, -0.29] |                           |                          |                             |                          |
| Observations                                 | 3,756                       | 931                       | 949                      | 956                         | 920                      |
| R <sup>2</sup> / R <sup>2</sup> adjusted     | 0.107 / 0.105               | 0.026 / 0.022             | 0.020 / 0.017            | 0.018 / 0.015               | 0.002 / -0.002           |

*Top 10% of income shows a coefficient relative to participants belonging to the 'general population' in their country. \*  $p < .05$ , \*\*  $p < .01$ , \*\*\*  $p < .001$*

**Supplementary Table 7.** Mixed-effects model predicting composite climate policy support with covariates

|                                                      | Climate policy support |              |
|------------------------------------------------------|------------------------|--------------|
|                                                      | Estimates              | 95% CI       |
| (Intercept)                                          | 4.38 ***               | 4.30, 4.45   |
| CF inequality perception                             | -0.05 ***              | -0.08, -0.02 |
| Climate change concern                               | 0.40 ***               | 0.36, 0.44   |
| Personal norm                                        | 0.23 ***               | 0.19, 0.28   |
| Descriptive norm                                     | 0.08 ***               | 0.04, 0.12   |
| Trust in government                                  | 0.18 ***               | 0.15, 0.21   |
| Political orientation                                | -0.11 ***              | -0.14, -0.08 |
| Age                                                  | 0.02                   | -0.01, 0.05  |
| Top 10% of income                                    | 0.06 *                 | 0.00, 0.12   |
| Female                                               | 0.00                   | -0.06, 0.07  |
| Ref. (Denmark)                                       |                        |              |
| India                                                | 0.66 ***               | 0.58, 0.74   |
| Nigeria                                              | 0.34 ***               | 0.26, 0.42   |
| United States                                        | -0.38 ***              | -0.47, -0.30 |
| <b>Random Effects</b>                                |                        |              |
| $\sigma^2$                                           | 2.66                   |              |
| $\tau_{00}$ Responseld                               | 0.60                   |              |
| ICC                                                  | 0.19                   |              |
| N Responseld                                         | 3,747                  |              |
| Observations                                         | 44,964                 |              |
| Marginal R <sup>2</sup> / Conditional R <sup>2</sup> | 0.171 / 0.324          |              |

*Top 10% of income shows a coefficient relative to participants belonging to the 'general population' in their country, whereas Female shows a coefficient relative to identifying as male. \* $p < .05$ , \*\* $p < .01$ , \*\*\* $p < .001$*

**Supplementary Table 8.** Linear regression models predicting composite support for climate policies with covariates by country

|                                          | <b>Total</b>                | <b>Denmark</b>              | <b>India</b>             | <b>Nigeria</b>              | <b>United States</b>        |
|------------------------------------------|-----------------------------|-----------------------------|--------------------------|-----------------------------|-----------------------------|
| (Intercept)                              | 4.38 ***<br>[4.30, 4.45]    | 4.33 ***<br>[4.24, 4.42]    | 5.01 ***<br>[4.91, 5.11] | 4.83 ***<br>[4.74, 4.92]    | 4.06 ***<br>[3.93, 4.18]    |
| CF inequality perception                 | -0.05 ***<br>[-0.08, -0.02] | -0.06 *<br>[-0.12, -0.01]   | -0.02<br>[-0.08, 0.03]   | -0.09 **<br>[-0.14, -0.03]  | -0.01<br>[-0.07, 0.05]      |
| Climate change concern                   | 0.40 ***<br>[0.36, 0.44]    | 0.52 ***<br>[0.43, 0.60]    | 0.18 ***<br>[0.10, 0.26] | 0.25 ***<br>[0.18, 0.32]    | 0.61 ***<br>[0.49, 0.72]    |
| Personal norm                            | 0.23 ***<br>[0.19, 0.28]    | 0.29 ***<br>[0.20, 0.38]    | 0.19 ***<br>[0.11, 0.27] | 0.13 ***<br>[0.06, 0.20]    | 0.17 **<br>[0.04, 0.29]     |
| Descriptive norm                         | 0.08 ***<br>[0.04, 0.12]    | 0.00<br>[-0.06, 0.06]       | 0.06<br>[-0.01, 0.13]    | 0.10 **<br>[0.03, 0.16]     | 0.14 **<br>[0.05, 0.23]     |
| Trust in government                      | 0.18 ***<br>[0.15, 0.21]    | 0.17 ***<br>[0.11, 0.22]    | 0.07 *<br>[0.00, 0.14]   | 0.06<br>[-0.00, 0.12]       | 0.23 ***<br>[0.15, 0.30]    |
| Political orientation                    | -0.11 ***<br>[-0.14, -0.08] | -0.20 ***<br>[-0.26, -0.15] | 0.13 ***<br>[0.07, 0.19] | 0.04<br>[-0.02, 0.10]       | -0.12 ***<br>[-0.19, -0.06] |
| Age                                      | 0.02<br>[-0.01, 0.05]       | -0.03<br>[-0.08, 0.03]      | 0.13 ***<br>[0.07, 0.19] | 0.19 ***<br>[0.13, 0.26]    | -0.12 ***<br>[-0.18, -0.06] |
| Top 10% of income                        | 0.06 *<br>[0.00, 0.12]      | 0.10<br>[-0.01, 0.21]       | 0.14 *<br>[0.03, 0.26]   | -0.05<br>[-0.17, 0.08]      | -0.07<br>[-0.19, 0.06]      |
| Female                                   | 0.36<br>[-0.06, 0.07]       | 0.06<br>[-0.05, 0.17]       | -0.04<br>[-0.16, 0.08]   | -0.21 ***<br>[-0.34, -0.09] | 0.03<br>[-0.66, 0.72]       |
| Ref. (Denmark)                           |                             |                             |                          |                             |                             |
| India                                    | 0.66 ***<br>[0.57, 0.74]    |                             |                          |                             |                             |
| Nigeria                                  | 0.34 ***<br>[0.26, 0.42]    |                             |                          |                             |                             |
| United States                            | -0.38 ***<br>[-0.47, -0.30] |                             |                          |                             |                             |
| Observations                             | 3,747                       | 923                         | 949                      | 956                         | 919                         |
| R <sup>2</sup> / R <sup>2</sup> adjusted | 0.449 / 0.447               | 0.569 / 0.564               | 0.245 / 0.236            | 0.254 / 0.246               | 0.577 / 0.573               |

*Top 10% of income shows a coefficient relative to participants belonging to the 'general population' in their country, whereas Female shows a coefficient relative to identifying as male. \*p < .05, \*\*p < .01, \*\*\*p < .001*

**Supplementary Table 9.** Perceived fairness of actual carbon footprint inequality (test of hypothesis 3).

|                                                         | Without outliers<br>(pre-registered) |               | Full sample             |               | Top 10% reference       |               |
|---------------------------------------------------------|--------------------------------------|---------------|-------------------------|---------------|-------------------------|---------------|
|                                                         | <i>Estimates</i>                     | <i>95% CI</i> | <i>Estimates</i>        | <i>95% CI</i> | <i>Estimates</i>        | <i>95% CI</i> |
| (Intercept)                                             | 3.43 ***                             | 3.00, 3.87    | 3.45 ***                | 3.02, 3.88    | 3.43 ***                | 2.99, 3.87    |
| CF inequality perception                                | 0.16 ***                             | 0.10, 0.22    | 0.09 **                 | 0.03, 0.14    | 0.19 ***                | 0.13, 0.25    |
| Top 10% of income                                       | 0.44 ***                             | 0.32, 0.56    | 0.43 ***                | 0.31, 0.54    | 0.44 ***                | 0.32, 0.56    |
| <b>Random Effects</b>                                   |                                      |               |                         |               |                         |               |
| $\sigma^2$                                              | 3.45                                 |               | 3.47                    |               | 3.44                    |               |
| $\tau_{00}$                                             | 0.19 <sub>country</sub>              |               | 0.19 <sub>country</sub> |               | 0.19 <sub>country</sub> |               |
| ICC                                                     | 0.05                                 |               | 0.05                    |               | 0.05                    |               |
| N                                                       | 4 <sub>country</sub>                 |               | 4 <sub>country</sub>    |               | 4 <sub>country</sub>    |               |
| Observations                                            | 3,756                                |               | 4,003                   |               | 3,757                   |               |
| Marginal R <sup>2</sup> /<br>Conditional R <sup>2</sup> | 0.020 / 0.071                        |               | 0.014 / 0.064           |               | 0.022 / 0.074           |               |

*Top 10% of income shows a coefficient relative to participants belonging to the 'general population' in their country. \*p < .05, \*\*p < .01, \*\*\*p < .001*

**Supplementary Table 10.** Linear regression models predicting perceived fairness of actual carbon footprint inequality by country.

|                                          | <b>Total</b>             | <b>Denmark</b>           | <b>India</b>             | <b>Nigeria</b>           | <b>United States</b>     |
|------------------------------------------|--------------------------|--------------------------|--------------------------|--------------------------|--------------------------|
| (Intercept)                              | 2.89 ***<br>[2.75, 3.02] | 2.88 ***<br>[2.73, 3.03] | 3.89 ***<br>[3.70, 4.08] | 3.86 ***<br>[3.70, 4.02] | 3.12 ***<br>[2.95, 3.29] |
| CF inequality perception                 | 0.16 ***<br>[0.10, 0.22] | 0.06<br>[-0.05, 0.17]    | 0.36 ***<br>[0.23, 0.50] | 0.09<br>[-0.02, 0.20]    | 0.15 *<br>[0.03, 0.27]   |
| Top 10% of income                        | 0.44 ***<br>[0.32, 0.56] | 0.46 ***<br>[0.25, 0.67] | 0.20<br>[-0.06, 0.47]    | 0.62 ***<br>[0.39, 0.84] | 0.46 ***<br>[0.22, 0.71] |
| Ref. (Denmark)                           |                          |                          |                          |                          |                          |
| India                                    | 0.88 ***<br>[0.72, 1.05] |                          |                          |                          |                          |
| Nigeria                                  | 1.07 ***<br>[0.90, 1.23] |                          |                          |                          |                          |
| United States                            | 0.24 **<br>[0.07, 0.41]  |                          |                          |                          |                          |
| Observations                             | 3,756                    | 931                      | 949                      | 956                      | 920                      |
| R <sup>2</sup> / R <sup>2</sup> adjusted | 0.072 / 0.070            | 0.020 / 0.018            | 0.032 / 0.030            | 0.031 / 0.029            | 0.020 / 0.018            |

*Top 10% of income shows a coefficient relative to participants belonging to the 'general population' in their country. \* $p < .05$ , \*\* $p < .01$ , \*\*\* $p < .001$*

**Supplementary Table 11.** Linear regression models predicting perceived fairness actual carbon footprint inequality with an interaction effect between carbon footprint inequality perception and participants' income segment.

|                                              | <b>Total</b>             | <b>Denmark</b>           | <b>India</b>             | <b>Nigeria</b>           | <b>United States</b>     |
|----------------------------------------------|--------------------------|--------------------------|--------------------------|--------------------------|--------------------------|
| (Intercept)                                  | 2.89 ***<br>[2.76, 3.02] | 2.88 ***<br>[2.73, 3.03] | 3.89 ***<br>[3.70, 4.08] | 3.87 ***<br>[3.71, 4.02] | 3.12 ***<br>[2.95, 3.30] |
| CF inequality perception                     | 0.09 *<br>[0.01, 0.16]   | 0.04<br>[-0.09, 0.18]    | 0.25 *<br>[0.05, 0.45]   | 0.06<br>[-0.07, 0.18]    | 0.06<br>[-0.10, 0.22]    |
| Top 10% of income                            | 0.45 ***<br>[0.33, 0.56] | 0.46 ***<br>[0.25, 0.67] | 0.20<br>[-0.06, 0.47]    | 0.62 ***<br>[0.40, 0.85] | 0.47 ***<br>[0.22, 0.71] |
| CF inequality perception × Top 10% of income | 0.19 **<br>[0.07, 0.31]  | 0.04<br>[-0.18, 0.26]    | 0.21<br>[-0.06, 0.47]    | 0.15<br>[-0.13, 0.42]    | 0.20<br>[-0.05, 0.45]    |
| Ref. (Denmark)                               |                          |                          |                          |                          |                          |
| India                                        | 0.88 ***<br>[0.71, 1.05] |                          |                          |                          |                          |
| Nigeria                                      | 1.07 ***<br>[0.90, 1.23] |                          |                          |                          |                          |
| United States                                | 0.24 **<br>[0.08, 0.41]  |                          |                          |                          |                          |
| Observations                                 | 3,756                    | 931                      | 949                      | 956                      | 920                      |
| R <sup>2</sup> / R <sup>2</sup> adjusted     | 0.074 / 0.073            | 0.020 / 0.017            | 0.034 / 0.031            | 0.032 / 0.029            | 0.023 / 0.019            |

*Top 10% of income shows a coefficient relative to participants belonging to the 'general population' in their country. \*p < .05, \*\*p < .01, \*\*\*p < .001*

**Supplementary Table 12.** Mixed-effects model predicting perceived fairness of actual carbon footprint inequality with covariates.

|                                                      | Perceived fairness |              |
|------------------------------------------------------|--------------------|--------------|
|                                                      | Estimates          | 95% CI       |
| (Intercept)                                          | 3.59 ***           | 3.16, 4.02   |
| CF inequality perception                             | 0.10 ***           | 0.05, 0.16   |
| Climate change concern                               | -0.13 **           | -0.21, -0.05 |
| Personal norm                                        | -0.06              | -0.14, 0.03  |
| Descriptive norm                                     | 0.21 ***           | 0.14, 0.28   |
| Trust in government                                  | 0.31 ***           | 0.25, 0.37   |
| Political orientation                                | 0.46 ***           | 0.41, 0.52   |
| Age                                                  | -0.09 **           | -0.15, -0.03 |
| Top 10% of income                                    | 0.28 ***           | 0.16, 0.39   |
| Female                                               | -0.17 **           | -0.28, -0.05 |
| <b>Random Effects</b>                                |                    |              |
| $\sigma^2$                                           | 3.03               |              |
| $\tau_{00}$ country                                  | 0.18               |              |
| ICC                                                  | 0.06               |              |
| N <sub>country</sub>                                 | 4                  |              |
| Observations                                         | 3,747              |              |
| Marginal R <sup>2</sup> / Conditional R <sup>2</sup> | 0.132 / 0.181      |              |

*Top 10% of income shows a coefficient relative to participants belonging to the 'general population' in their country, whereas Female shows a coefficient relative to identifying as male. \*p < .05, \*\*p < .01, \*\*\*p < .001*



**Supplementary Table 13.** Linear regression models predicting perceived fairness of actual carbon footprint inequality with covariates by country.

|                                          | <b>Total</b>               | <b>Denmark</b>              | <b>India</b>             | <b>Nigeria</b>              | <b>United States</b>        |
|------------------------------------------|----------------------------|-----------------------------|--------------------------|-----------------------------|-----------------------------|
| (Intercept)                              | 3.04 ***<br>[2.90, 3.18]   | 3.00 ***<br>[2.83, 3.17]    | 3.89 ***<br>[3.68, 4.10] | 4.04 ***<br>[3.87, 4.21]    | 3.34 ***<br>[3.11, 3.57]    |
| CF inequality perception                 | 0.10 ***<br>[0.05, 0.16]   | -0.02<br>[-0.12, 0.08]      | 0.24 ***<br>[0.11, 0.37] | 0.11 *<br>[0.00, 0.21]      | 0.08<br>[-0.04, 0.19]       |
| Climate change concern                   | -0.13 **<br>[-0.21, -0.05] | -0.25 **<br>[-0.41, -0.09]  | -0.06<br>[-0.23, 0.11]   | 0.20 **<br>[0.05, 0.34]     | -0.37 ***<br>[-0.58, -0.16] |
| Personal norm                            | -0.06<br>[-0.14, 0.03]     | -0.10<br>[-0.27, 0.06]      | -0.15<br>[-0.32, 0.02]   | 0.16 *<br>[0.03, 0.30]      | -0.04<br>[-0.27, 0.20]      |
| Descriptive norm                         | 0.21 ***<br>[0.14, 0.28]   | 0.08<br>[-0.04, 0.20]       | 0.38 ***<br>[0.23, 0.53] | 0.09<br>[-0.04, 0.22]       | 0.21 *<br>[0.04, 0.38]      |
| Trust in government                      | 0.31 ***<br>[0.25, 0.37]   | 0.15 **<br>[0.05, 0.25]     | 0.36 ***<br>[0.22, 0.50] | 0.38 ***<br>[0.26, 0.49]    | 0.39 ***<br>[0.26, 0.53]    |
| Political orientation                    | 0.46 ***<br>[0.41, 0.52]   | 0.41 ***<br>[0.30, 0.52]    | 0.34 ***<br>[0.20, 0.47] | 0.24 ***<br>[0.13, 0.35]    | 0.53 ***<br>[0.40, 0.65]    |
| Age                                      | -0.09 **<br>[-0.15, -0.03] | -0.25 ***<br>[-0.35, -0.15] | -0.03<br>[-0.16, 0.10]   | 0.12 *<br>[0.00, 0.24]      | -0.23 ***<br>[-0.35, -0.12] |
| Top 10% of income                        | 0.28 ***<br>[0.16, 0.39]   | 0.40 ***<br>[0.20, 0.61]    | 0.07<br>[-0.19, 0.32]    | 0.49 ***<br>[0.25, 0.73]    | 0.24<br>[-0.00, 0.48]       |
| Female                                   | -0.16 **<br>[-0.28, -0.05] | -0.21 *<br>[-0.41, -0.01]   | 0.20<br>[-0.05, 0.46]    | -0.47 ***<br>[-0.71, -0.24] | -0.20<br>[-0.44, 0.05]      |
| Ref. (Denmark)                           |                            |                             |                          |                             |                             |
| India                                    | 0.90 ***<br>[0.74, 1.06]   |                             |                          |                             |                             |
| Nigeria                                  | 1.04 ***<br>[0.88, 1.20]   |                             |                          |                             |                             |
| United States                            | 0.27 **<br>[0.11, 0.43]    |                             |                          |                             |                             |
| Observations                             | 3,747                      | 923                         | 949                      | 956                         | 919                         |
| R <sup>2</sup> / R <sup>2</sup> adjusted | 0.183 / 0.180              | 0.163 / 0.153               | 0.155 / 0.145            | 0.209 / 0.200               | 0.191 / 0.182               |

*Top 10% of income shows a coefficient relative to participants belonging to the 'general population' in their country, whereas Female shows a coefficient relative to identifying as male. \*p < .05, \*\*p < .01, \*\*\*p < .001*

**Supplementary Table 14.** Sensitivity analysis of relative estimation error associated with estimated personal carbon footprints with additional outlier removal (*HI*).

|                                    | Sensitivity analysis |               |
|------------------------------------|----------------------|---------------|
|                                    | <i>Estimates</i>     | <i>95% CI</i> |
| (Intercept)                        | 1.45 ***             | 0.94, 1.95    |
| Estimation error (Top 1%)          | -2.21 ***            | -2.36, -2.05  |
| Estimation error (Top 10%)         | -1.70 ***            | -1.85, -1.55  |
| Income segment (Top 10%)           | 0.07                 | -0.06, 0.20   |
| <b>Random Effects</b>              |                      |               |
| $\sigma^2$                         | 11.20                |               |
| $\tau_{00}$ Responseld             | 0.27                 |               |
| $\tau_{00}$ country                | 0.25                 |               |
| ICC                                | 0.04                 |               |
| $N_{\text{country}}$               | 4                    |               |
| $N_{\text{Responseld}}$            | 3,943                |               |
| Observations                       | 11,302               |               |
| Marginal $R^2$ / Conditional $R^2$ | 0.071 / 0.112        |               |

*Income segment (Top 10%) refers to participants belonging to the Top 10% of income within their country and shows coefficients relative to belonging to the general population. \* $p < .05$ , \*\* $p < .01$ , \*\*\* $p < .001$*

**Supplementary Table 15.** Sensitivity analysis of linear regression models predicting carbon footprint inequality perception with covariates by country with additional outlier removal (+/- 3SD).

|                                          | Total                     | Denmark                  | India                    | Nigeria                     | United States            |
|------------------------------------------|---------------------------|--------------------------|--------------------------|-----------------------------|--------------------------|
| (Intercept)                              | 1.18 ***<br>[0.75, 1.62]  | 1.25 ***<br>[1.20, 1.30] | 4.86 ***<br>[3.74, 5.99] | 0.64 ***<br>[0.43, 0.86]    | 1.71 ***<br>[1.59, 1.84] |
| Climate change concern                   | -0.10<br>[-0.35, 0.15]    | -0.02<br>[-0.06, 0.03]   | -0.27<br>[-1.19, 0.64]   | -0.12<br>[-0.30, 0.06]      | -0.02<br>[-0.14, 0.09]   |
| Personal norm                            | -0.28 *<br>[-0.54, -0.01] | -0.03<br>[-0.08, 0.01]   | -0.91<br>[-1.85, 0.03]   | 0.02<br>[-0.15, 0.19]       | -0.01<br>[-0.13, 0.12]   |
| Descriptive norm                         | 0.41 ***<br>[0.19, 0.62]  | 0.03<br>[-0.00, 0.07]    | 1.06 *<br>[0.25, 1.87]   | 0.26 **<br>[0.10, 0.42]     | 0.03<br>[-0.06, 0.13]    |
| Trust in government                      | 0.20 *<br>[0.01, 0.39]    | -0.00<br>[-0.04, 0.03]   | 0.80 *<br>[0.03, 1.56]   | -0.20 **<br>[-0.34, -0.05]  | 0.04<br>[-0.04, 0.11]    |
| Political orientation                    | 0.18 *<br>[0.01, 0.36]    | 0.06 ***<br>[0.03, 0.09] | 0.47<br>[-0.25, 1.20]    | -0.09<br>[-0.23, 0.05]      | 0.06<br>[-0.00, 0.13]    |
| Age                                      | -0.09<br>[-0.27, 0.09]    | -0.00<br>[-0.03, 0.03]   | 0.13<br>[-0.56, 0.82]    | -0.57 ***<br>[-0.72, -0.43] | -0.05<br>[-0.11, 0.01]   |
| Top 10% of income                        | -0.25<br>[-0.61, 0.11]    | -0.02<br>[-0.08, 0.04]   | -1.00<br>[-2.37, 0.37]   | 0.54 ***<br>[0.24, 0.83]    | -0.07<br>[-0.20, 0.05]   |
| Female                                   | 0.43 *<br>[0.07, 0.80]    | 0.06 *<br>[0.00, 0.12]   | 0.88<br>[-0.48, 2.25]    | 0.23<br>[-0.07, 0.53]       | 0.10<br>[-0.03, 0.23]    |
| Ref. (Denmark)                           |                           |                          |                          |                             |                          |
| India                                    | 3.45 ***<br>[2.96, 3.94]  |                          |                          |                             |                          |
| Nigeria                                  | -0.22<br>[-0.71, 0.27]    |                          |                          |                             |                          |
| United States                            | 0.42<br>[-0.07, 0.91]     |                          |                          |                             |                          |
| Observations                             | 3,640                     | 896                      | 912                      | 939                         | 893                      |
| R <sup>2</sup> / R <sup>2</sup> adjusted | 0.082 / 0.078             | 0.037 / 0.027            | 0.028 / 0.017            | 0.081 / 0.072               | 0.016 / 0.006            |

*Top 10% of income shows a coefficient relative to participants belonging to the 'general population' in their country, whereas Female shows a coefficient relative to identifying as male. \*p < .05, \*\*p < .01, \*\*\*p < .001*

**Supplementary Fig. 1. Support for individual climate policies (Denmark).** Results of linear regression models predicting support for individual climate policies. All covariates were standardized, except ‘Top 10% of income’ and Female (see Methods). Female shows a coefficient relative to identifying as male. Dots represent point estimates with 95% confidence intervals. The sample size is  $N = 923$  for all policies.

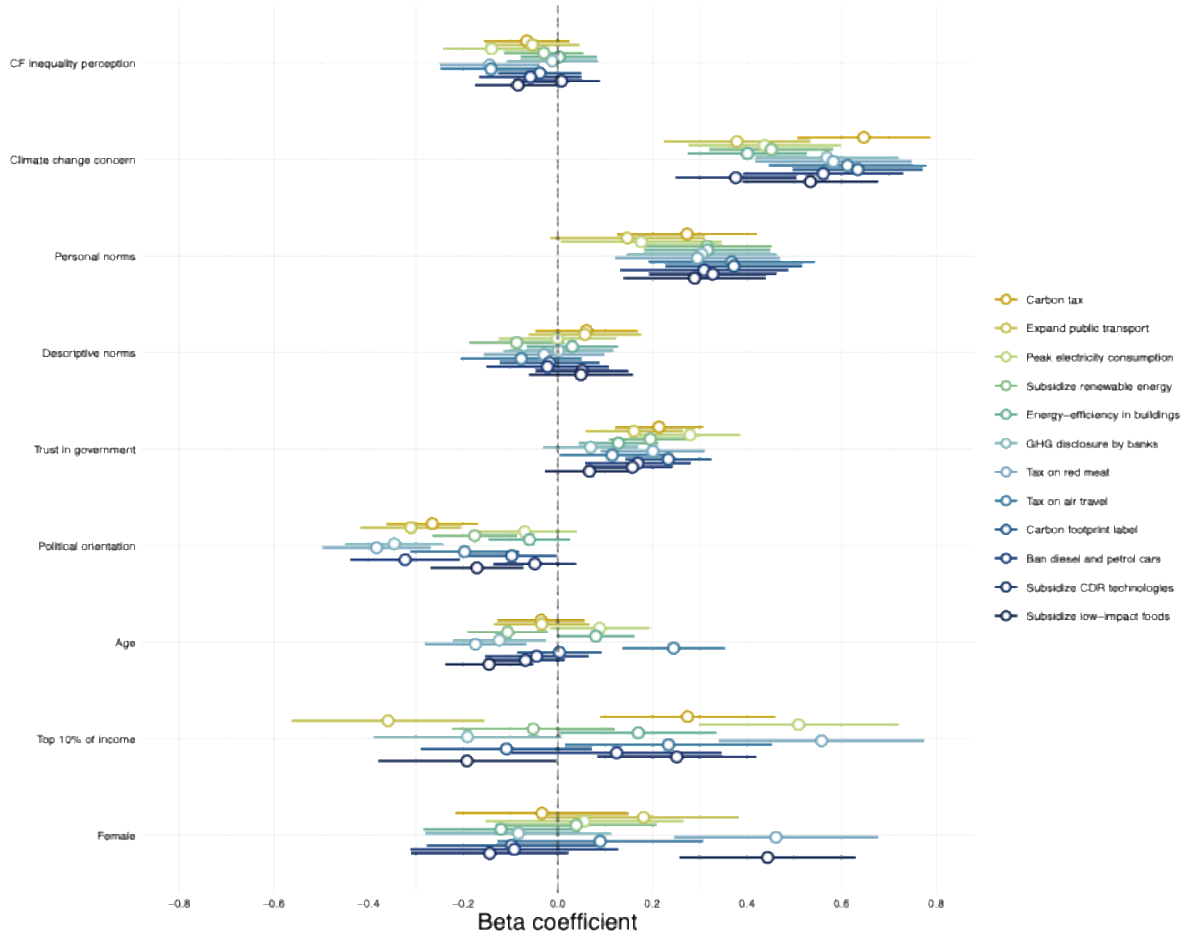

**Supplementary Fig. 2. Support for individual climate policies (India).** Results of linear regression models predicting support for individual climate policies. All covariates were standardized, except ‘Top 10% of income’ and Female (see Methods). Female shows a coefficient relative to identifying as male. Dots represent point estimates with 95% confidence intervals. The sample size is  $N = 949$  for all policies.

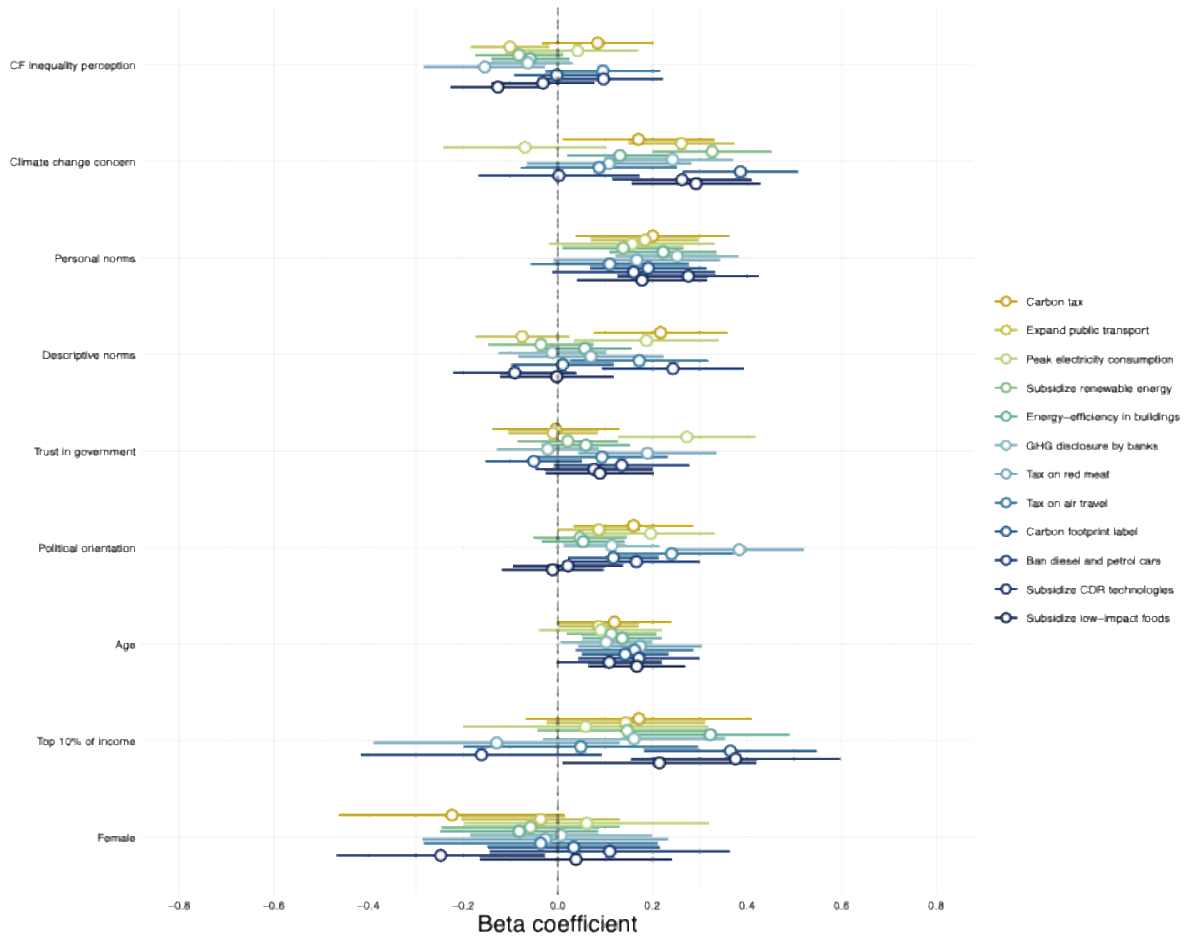

**Supplementary Fig. 3. Support for individual climate policies (Nigeria).** Results of linear regression models predicting support for individual climate policies. All covariates were standardized, except ‘Top 10% of income’ and Female (see Methods). Female shows a coefficient relative to identifying as male. Dots represent point estimates with 95% confidence intervals. The sample size is  $N = 956$  for all policies.

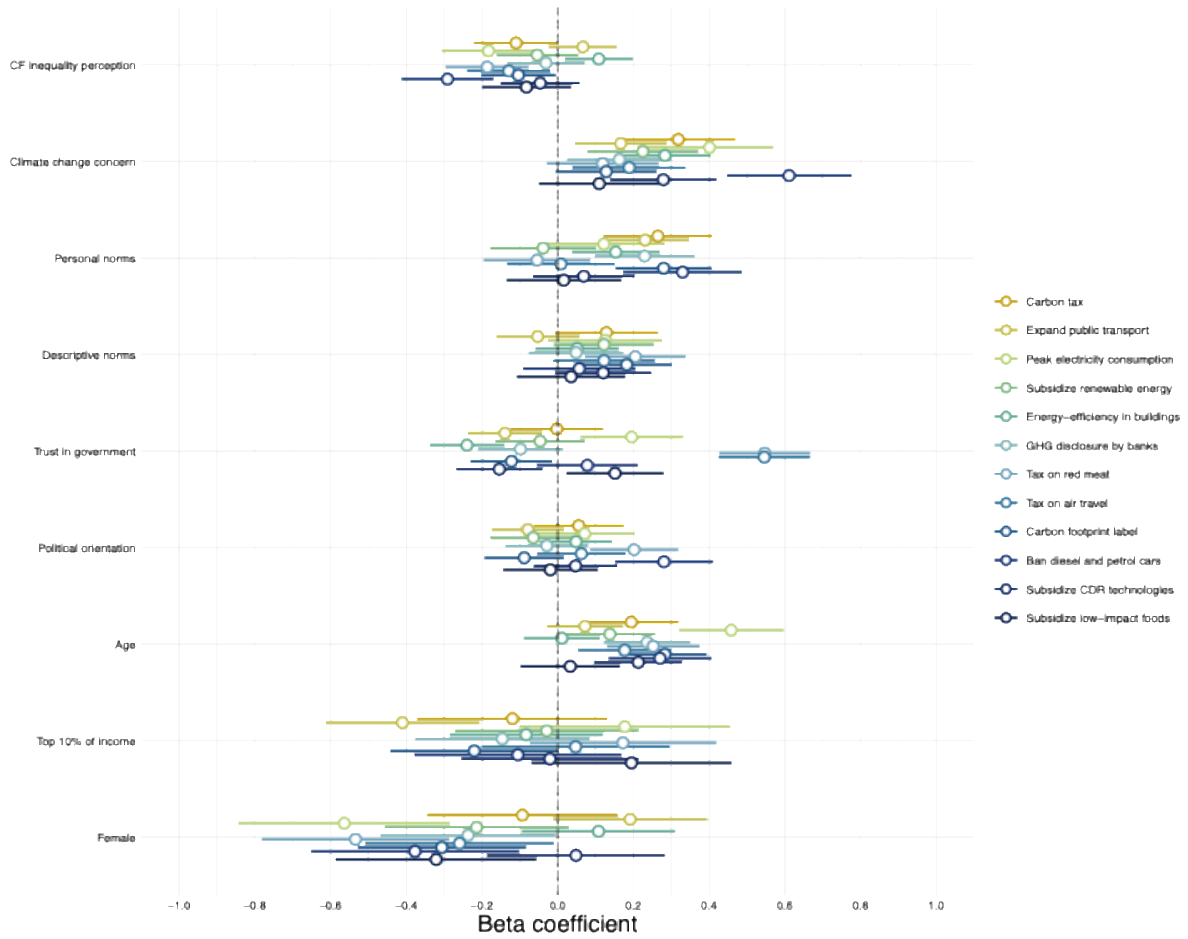

**Supplementary Fig. 4. Support for individual climate policies (United States).** Results of linear regression models predicting support for individual climate policies. All covariates were standardized, except 'Top 10% of income' and Female (see Methods). Female shows a coefficient relative to identifying as male. Dots represent point estimates with 95% confidence intervals. The sample size is  $N = 919$  for all policies.

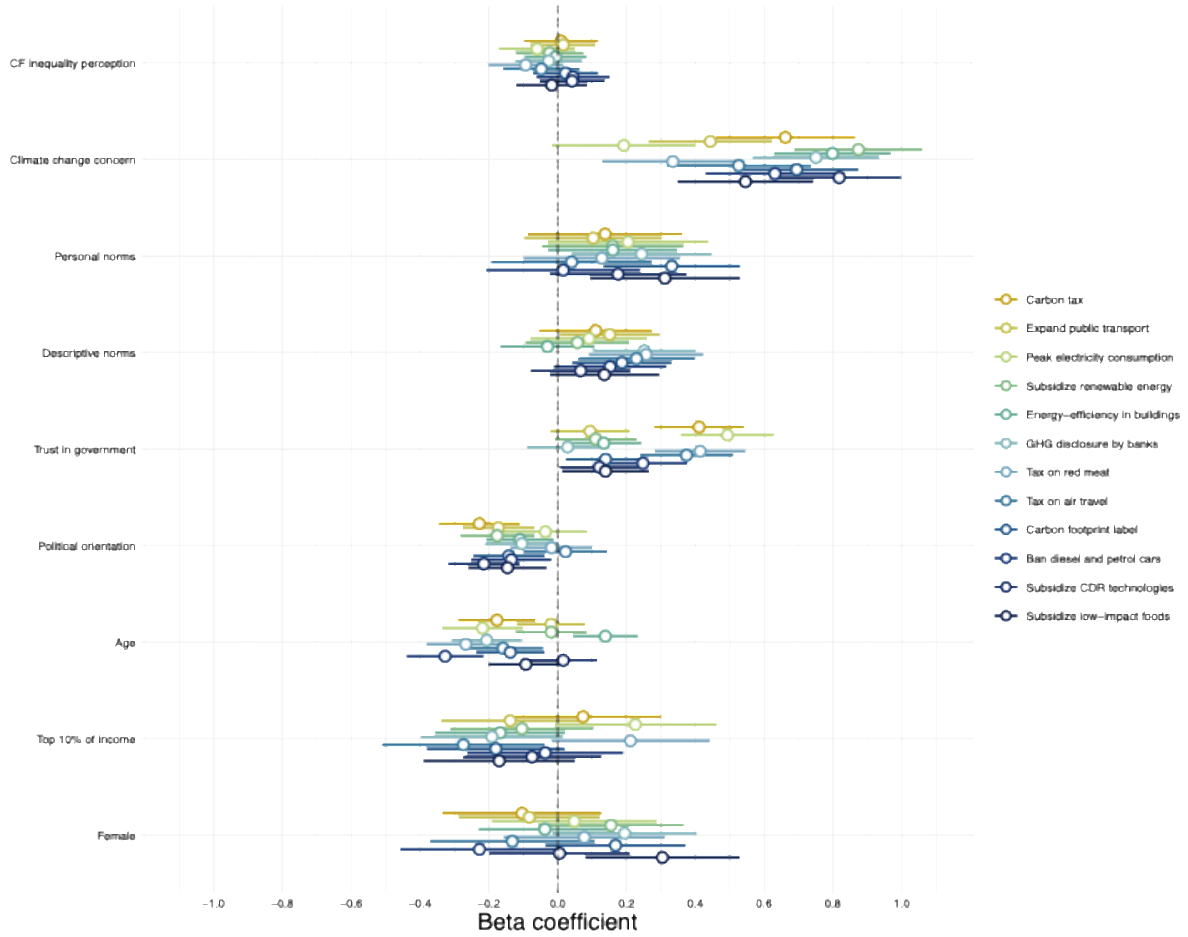

**Supplementary Fig. 5. Sensitivity analysis with additional outlier removal from relative estimation error variables and carbon footprint inequality perception.** **A**, relative estimation error for the Bottom 50% of income with additional outlier removal ( $\pm 3SD$  from the pre-registered 2.5-97.5 percentiles per income group and country). **B**, relative estimation error for the Top 10% of income ( $\pm 3SD$  from the pre-registered 2.5-97.5 percentiles per income group and country). **C**, relative estimation error for the Top 1% of income ( $\pm 3SD$  from the pre-registered 2.5-97.5 percentiles per income group and country). **D**, carbon footprint inequality perception with additional outlier removal. Positive values reflect an underestimation of the average carbon footprint of the Top 1% income group relative to the Bottom 50% income group. In contrast, negative values indicate an overestimation of the average carbon footprint of the Top 1% income group relative to the Bottom 50% income group. **E**, carbon footprint inequality perception z-standardized at the country level.

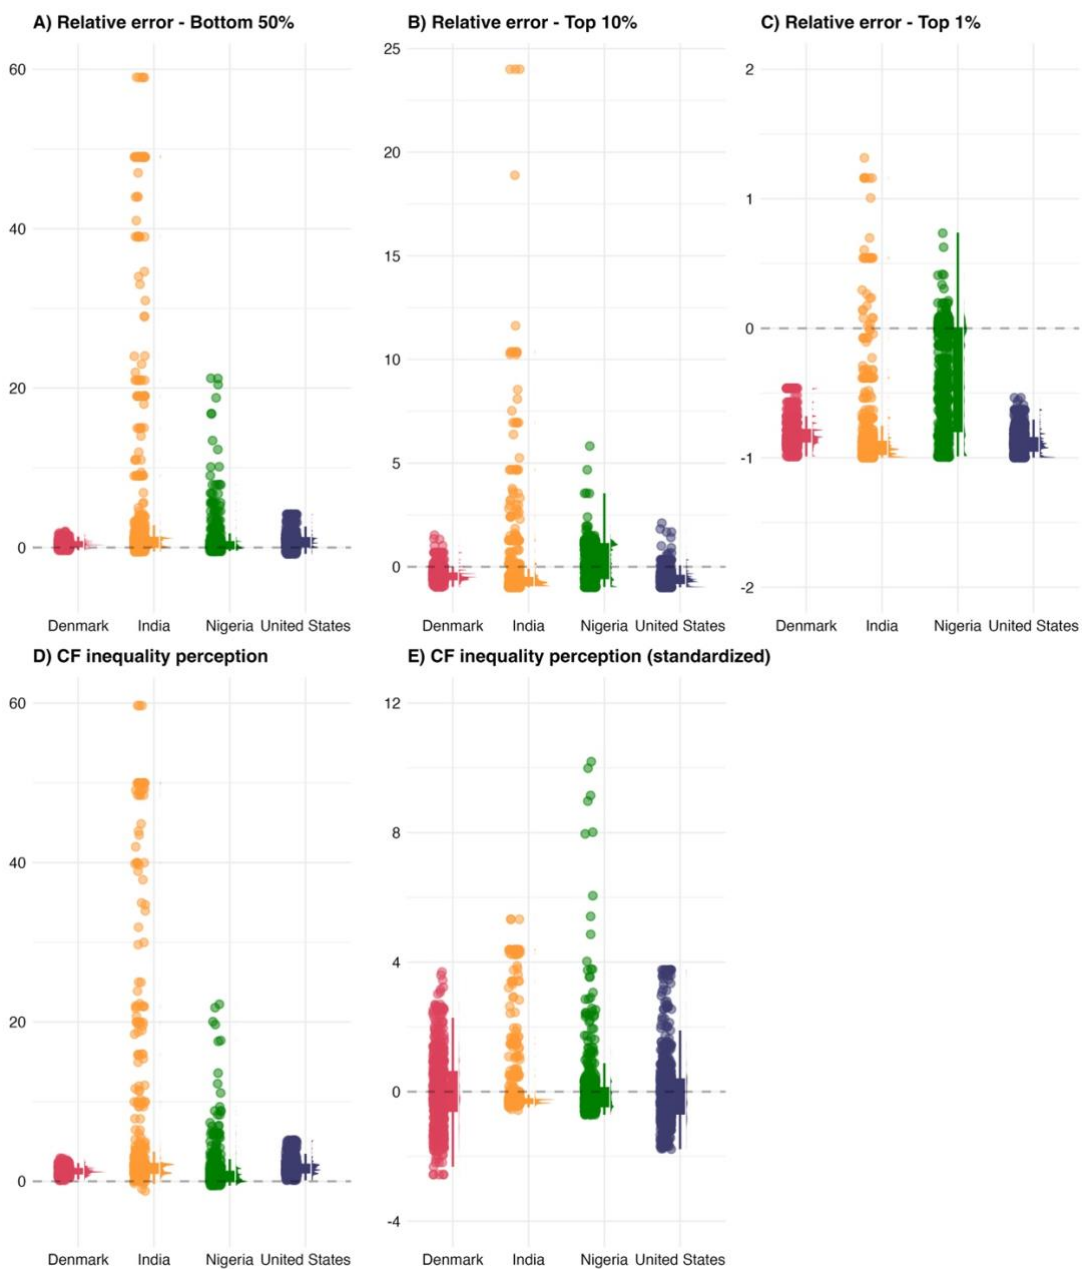



**Supplementary Fig. 6. Sensitivity analysis of predictors of composite climate policy support with additional outlier removal (+/- 3SD; H2).** **A**, Mixed-effects regression model predicting composite climate policy support at the aggregate level ( $N = 3,649$ ). **B**, Country-specific linear regression models predicting composite climate policy support. The sample sizes are Denmark ( $N = 904$ ), India ( $N = 912$ ), Nigeria ( $N = 939$ ), and the United States ( $N = 894$ ). **C**, Country-specific linear regression models predicting composite climate policy support with socio-demographic and psychological covariates. All covariates were standardized at the country level, except for Top 10% of income and Female (see Methods). Top 10% of income shows a coefficient relative to participants belonging to the ‘general population’ in their country, whereas Female shows a coefficient relative to identifying as male. The sample sizes are Denmark ( $N = 896$ ), India ( $N = 912$ ), Nigeria ( $N = 939$ ), and the United States ( $N = 893$ ). Dots represent point estimates with 95% confidence intervals.

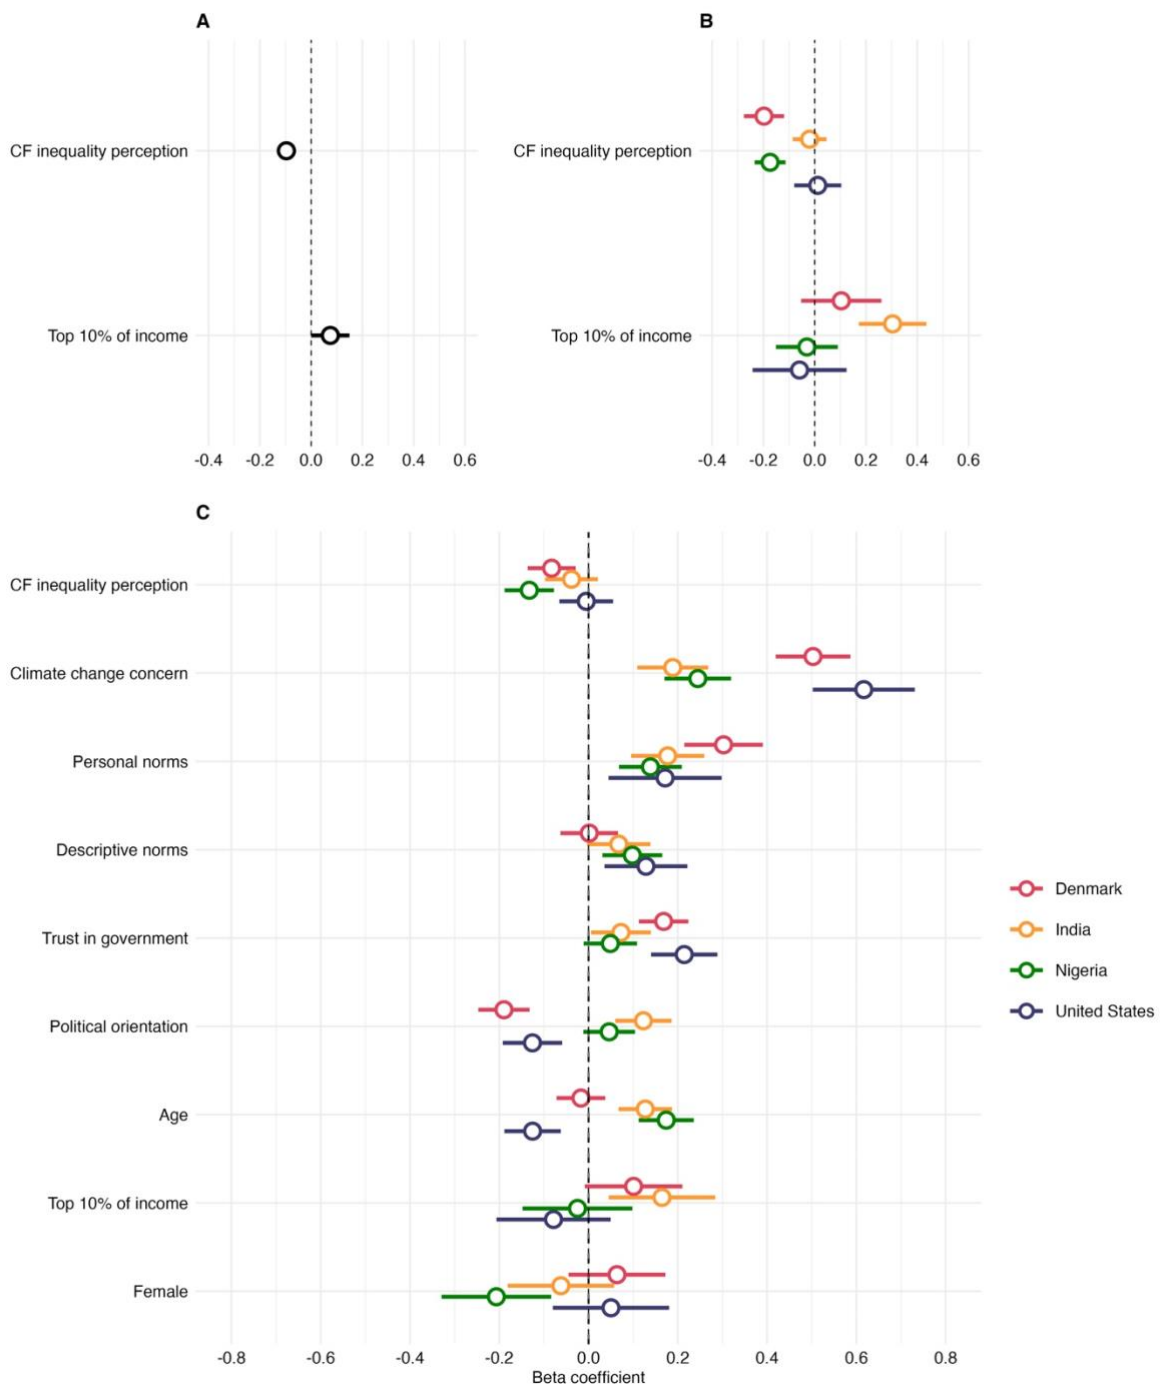

**Supplementary Fig. 7. Sensitivity analysis of perceived fairness of actual carbon footprint inequality with additional outlier removal (+/- 3SD; H3).** **A**, Mixed-effects regression model predicting perceived fairness of actual carbon footprint inequality at the aggregate level ( $N = 3,649$ ). **B**, Country-specific linear regression models predicting perceived fairness of actual carbon footprint inequality. The sample sizes are Denmark ( $N = 904$ ), India ( $N = 912$ ), Nigeria ( $N = 939$ ), and the United States ( $N = 894$ ). **C**, Country-specific linear regression models predicting perceived fairness of actual carbon footprint inequality with socio-demographic and psychological covariates. All covariates were standardized at the country level, except for Top 10% of income and Female (see Methods). Top 10% of income shows a coefficient relative to participants belonging to the ‘general population’ in their country, whereas Female shows a coefficient relative to identifying as male. The sample sizes are Denmark ( $N = 896$ ), India ( $N = 912$ ), Nigeria ( $N = 939$ ), and the United States ( $N = 893$ ). Dots represent point estimates with 95% confidence intervals.

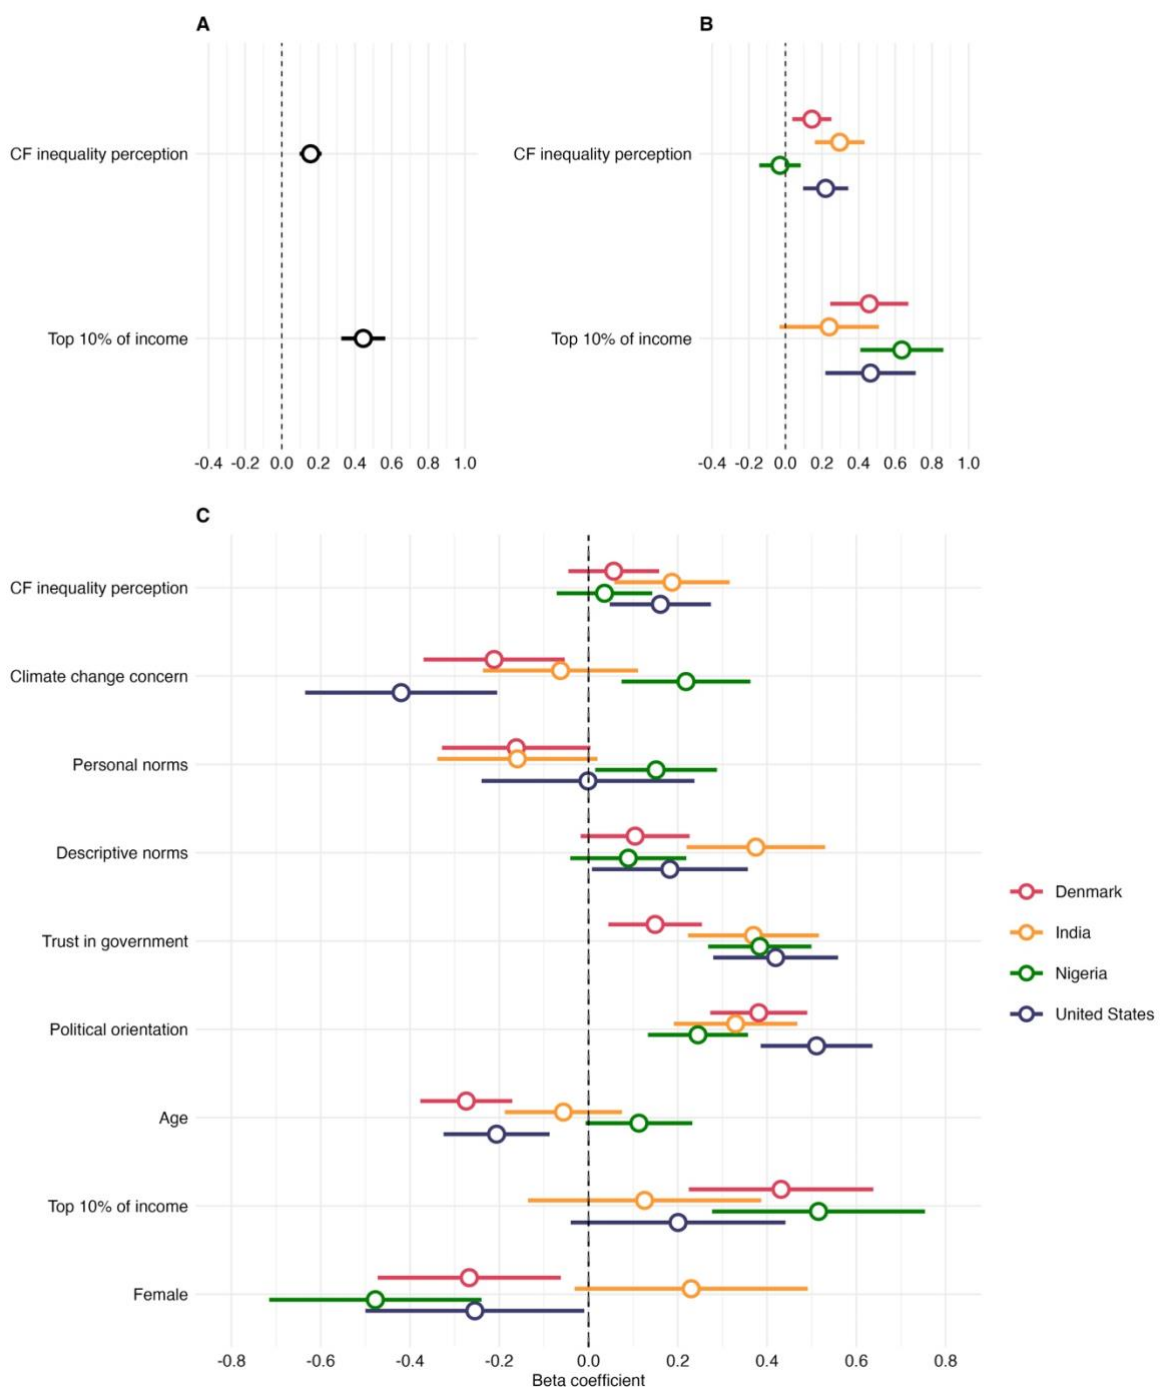

Supplement: 41558_2024_2130_MOESM1_ESM.pdf [file 41558_2024_2130_MOESM1_ESM.pdf]
